# Supplementary material
Source: PubMed Central journal article supplement (PMC3824127)
Supplement: mmc1.pdf [file mmc1.pdf]

## Supplemental Data

### Mutations in *SERPINB7*, Encoding a Member of the Serine Protease Inhibitor Superfamily,

### Cause Nagashima-type Palmoplantar Keratosis

Akiharu Kubo, Aiko Shiohama, Takashi Sasaki, Kazuhiko Nakabayashi,  
Hiroshi Kawasaki, Toru Atsugi, Showbu Sato, Atsushi Shimizu, Shuji Mikami,  
Hideaki Tanizaki, Masaki Uchiyama, Tatsuo Maeda, Taisuke Ito, Jun-ichi Sakabe,  
Toshio Heike, Torayuki Okuyama, Rika Kosaki, Kenjiro Kosaki, Jun Kudoh,  
Kenichiro Hata, Akihiro Umezawa, Yoshiki Tokura, Akira Ishiko, Hironori Niizeki,  
Kenji Kabashima, Yoshihiko Mitsuhashi, and Masayuki Amagai<sup>1</sup>

## Supplemental Inventory

### Supplemental Figures and Tables

Figure S1

Table S1

**Figure S1. Skin manifestations of the probands KDex8 and KDex20.**

KDex8: 38-year-old male

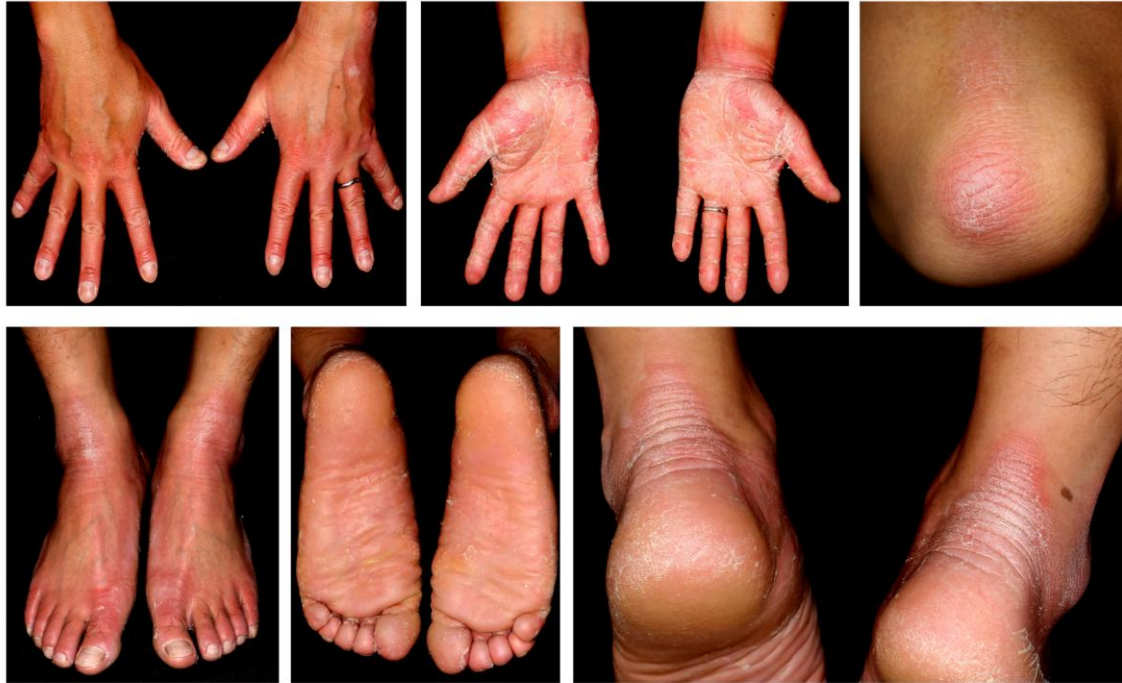

KDex20: 10-year-old female

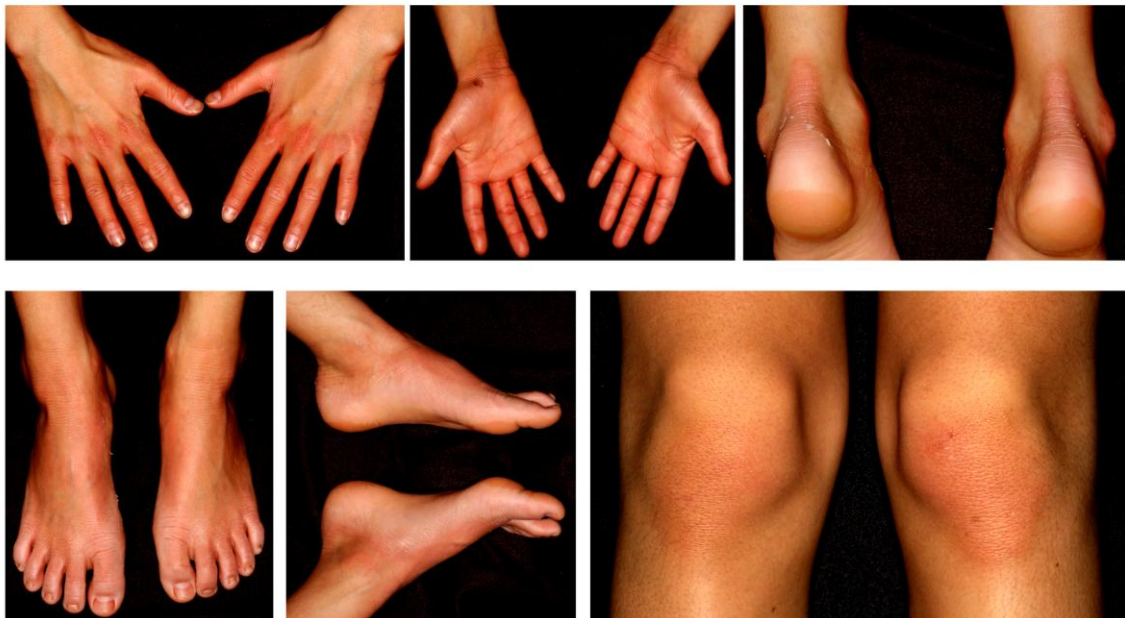

**Table S1:** Primers for genomic DNA amplification and sequencing of *SERPINB7*

| Exon # (Exon size)           | Primers <sup>b</sup> | Primer sequences <sup>c</sup> | Amplicon size |
|------------------------------|----------------------|-------------------------------|---------------|
| Exon 2 (186 bp) <sup>a</sup> | Sense                | TGATGATTACCTCCAAGGCTG         | 427 bp        |
|                              | Antisense            | AGATGTGACACCTTGTGCCTC         |               |
| Exon 3 (51 bp)               | Sense                | GGCAATTAGACACATTTATTGGG       | 280 bp        |
|                              | Antisense            | TGAACTCCTGGGCTCCAGTC          |               |
| Exon 4 (117 bp)              | Sense                | AGATGTATGTGGCCTTGTTTG         | 339 bp        |
|                              | Antisense            | GAAAGACACAAGCCTTTGTTCAG       |               |
| Exon 5 (118 bp)              | Sense                | TGAACCTTTGAATAAAGCAGTCG       | 328 bp        |
|                              | Antisense            | AGGAGGAGCTGTTTCCTTGATG        |               |
| Exon 6 (143 bp) <sup>a</sup> | Sense                | AAAGGGCCTAGAAAGTGCTGGA        | 373 bp        |
|                              | Antisense            | CCTGCAAAGGAATACGATTGTGG       |               |
| Exon 7 (147 bp)              | Sense                | AAAATCTGCAGGGTCAACTG          | 377 bp        |
|                              | Antisense            | TCTCTAGTATCTCAATACCCTGAAATC   |               |
| Exon 8 (337 bp) -1           | Sense                | GAACACAAATATCCAGGAAGCG        | 570 bp        |
|                              | Antisense            | GACTTGTGGTGGTTCTTTGATG        |               |
| Exon 8 (337 bp) -2           | Sense                | GTTTAGAGCTGACCACCCATTC        | 489 bp        |
|                              | Antisense            | GCAGGGCTTATTTCTAGATTG         |               |

<sup>a</sup>Only the sense primer is available for direct sequencing.

<sup>b</sup>Primers were designed from the flanking intron sequences except for the antisense primer for exon 8-1 and primers for exon 8-2.

<sup>c</sup>Primers were used for amplification and direct Sanger sequencing.

Abbreviation: bp = base pair.
